# Supplementary material for: Optimising Radioligand Therapy for Patients with Gastro-Entero-Pancreatic Neuroendocrine Tumours: Expert Opinion from an Italian Multidisciplinary Group
Source: PubMed Central journal article supplement — Adv Ther. 2023 Nov 21;41(1):113–29. doi: 10.1007/s12325-023-02714-8 (PMC10796590; doi:10.1007/s12325-023-02714-8), 2023-11-21
Supplement: 12325_2023_2714_MOESM1_ESM.pdf [file 12325_2023_2714_MOESM1_ESM.pdf]

# Optimising radioligand therapy for patients with gastro-entero-pancreatic neuroendocrine tumours: expert opinion from an Italian multidisciplinary group

## Electronic Supplementary Material

**Authors:** Nicola Fazio<sup>1\*</sup>, Massimo Falconi<sup>2\*</sup>, Emanuela Foglia<sup>3\*</sup>, Mirco Bartolomei<sup>4</sup>, Alfredo Berruti<sup>5,6</sup>, Mirko D’Onofrio<sup>7</sup>, Diego Ferone<sup>8</sup>, Alessandro Giordano<sup>9,10</sup>, Franco Grimaldi<sup>11</sup>, Massimo Milione<sup>12</sup>, Francesco Panzuto<sup>13</sup>, Monica Santimaria<sup>14</sup>, Orazio Schillaci<sup>15</sup>, Ettore Seregni<sup>16</sup>, Michele Stasi<sup>17</sup>, Marco Volante<sup>18</sup>, and Secondo Lastoria<sup>19</sup>

**Affiliations:** <sup>1</sup>Divisione di Oncologia Medica Gastrointestinale e Tumori Neuroendocrini, Istituto Europeo di Oncologia (IEO) IRCCS, Milan, Italy; <sup>2</sup>Pancreatic Surgery Unit, Pancreas Translational & Clinical Research Center, IRCCS San Raffaele Scientific institute, Vita-Salute San Raffaele University, Milan, Italy; <sup>3</sup>School of Industrial Engineering and HD LAB – Carlo Cattaneo – LIUC University, Castellanza, Italy; <sup>4</sup>Nuclear Medicine Unit, Azienda Ospedaliero-Universitaria di Ferrara, Ferrara, Italy; <sup>5</sup>Medical Oncology Unit, ASST Spedali Civili, Brescia, Italy; <sup>6</sup>Department of Medical & Surgical Specialties, Radiological Sciences & Public Health, University of Brescia, Brescia, Italy; <sup>7</sup>Radiology, GB Rossi University Hospital, University of Verona, Verona, Italy; <sup>8</sup>Endocrinology, Department of Internal Medicine and Medical Specialties (DiMI), University of Genova and Endocrinology Clinic, IRCCS, Ospedale Policlinico San Martino, Genova, Italy; <sup>9</sup>Nuclear Medicine Unit, Dipartimento di Diagnostica per Immagini, Radioterapia Oncologica ed Ematologia, Fondazione Policlinico Universitario Agostino Gemelli IRCCS, Rome, Italy; <sup>10</sup>Section of Nuclear Medicine, Dipartimento Universitario di Scienze Radiologiche ed Ematologia, Università Cattolica del Sacro Cuore, Rome, Italy; <sup>11</sup>Endocrinology and Diseases of Metabolism Unit, University Hospital Santa Maria Misericordia, Udine, Italy; <sup>12</sup>Anatomia Patologica, Fondazione IRCCS Istituto Nazionale dei Tumori, Milan, Italy; <sup>13</sup>Department of Medical-Surgical Sciences, Sapienza University and Digestive Disease Unit, Sant’Andrea University Hospital, ENETS Center of Excellence, Rome, Italy; <sup>14</sup>Nuclear Medicine Unit, S. Bortolo Hospital, AULSS 8

Berica, Vicenza, Italy; <sup>15</sup>Department of Biomedicine and Prevention, University Tor Vergata, Rome, Italy; <sup>16</sup>Nuclear Medicine Unit, Fondazione IRCCS Istituto Nazionale dei Tumori, Milan, Italy; <sup>17</sup>Medical Physics Department, A.O. Ordine Mauriziano di Torino, Turin, Italy; <sup>18</sup>Department of Oncology, University of Turin, and Pathology Unit, San Luigi Hospital, Orbassano, Turin, Italy; <sup>19</sup>Nuclear Medicine, IRCCS Istituto Nazionale Tumori “Fondazione Senatore G. Pascale”, Napoli, Italy.

\*These authors contributed equally to this work.

**Corresponding author:** Secondo Lastoria

**Email:** [s.lastoria@istitutotumori.na.it](mailto:s.lastoria@istitutotumori.na.it)

## SURVEY RESULTS

The survey was administered to 90 clinicians involved in the multidisciplinary management of patients with gastro-entero-pancreatic neuroendocrine tumours (GEP-NETs) in Italy in May 2021.

The survey results demonstrated that:

- Evaluation of disease progression needs to be optimised in the context of the patient journey;
- Time to progression (from previous therapy) is considered a key driver for the definition of new treatment; therefore, the proper and timely definition of disease progression is essential; and
- Computerised tomography (CT)/positron emission tomography (PET) or single-photon emission computerised tomography (SPECT) are primarily used during disease staging for radioligand therapy (RLT). Few clinicians prefer to use these imaging techniques to evaluate and characterise progression (**Figure 1**).

## ROUND TABLE DISCUSSIONS

Challenges related to RLT are not limited to the assessment of disease progression from baseline to define the most appropriate therapy and timely treatment. Other elements regarding the assessment of progression after treatment were discussed, including:

- The most appropriate imaging technique to define progression;
- Defining the proper time to evaluate progression; and
- Clarifying whether it is better to define progression during RLT administration or at the end of the therapy cycles.

The discussions revealed the following clinical messages:

- RLT is indicated in patients with grade 1–2 GEP-NETs, with a positive <sup>68</sup>Gallium-PET and in progression following somatostatin analogue therapy;
- Baseline progression on RLT should be read in a broad clinical sense; and
- The strategy to monitor RLT tumour response must be defined based on the morphological and functional characteristics of the tumour, its degree of malignancy and the general clinic.

The following needs were identified:

- The patient evaluation should include, in addition to Ki67, analysis of the receptor profile, the history of comorbidities and previous treatments, as well as fluorodeoxyglucose-PET and genetic profiling in selected patients;
- Definition of standardized diagnostic and therapeutic pathways; and
- Improved cooperation between hub and spoke centres by providing smaller centres with specific indications on how to characterize the patient, the disease and treatment.

## SUPPLEMENTARY FIGURE

**Supplementary Figure 1.** Key survey results, with responses to the following questions (a) Which stage of the GEP-NET patient journey needs to be optimised? (b) Which criteria drive therapeutic choices in GEP-NET patients? (c) What are the major complexities related to RL treatment in GEP-NET patients? And (d) When, in the case of RL therapy, does PET/CT or SPECT execution become important?

*CT* computed tomography, *FDG* fluorodeoxyglucose, *GEP-NET* gastro-entero-pancreatic neuroendocrine tumours, *PET* positron emission tomography, *RL* radioligand, *RLT* radioligand therapy, *SPECT* single-photon emission computed tomography.

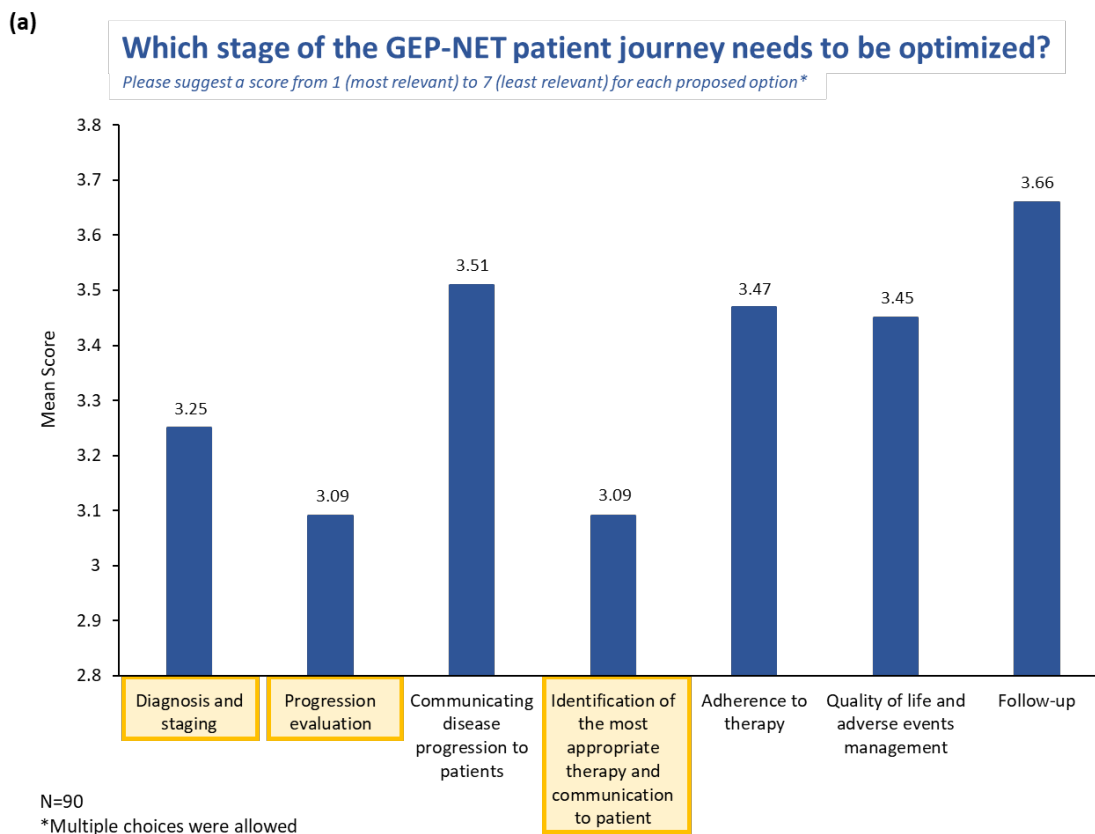

(b)

### Which criteria drive therapeutic choices in GEP-NET patients?

Please suggest up to three answer options\*

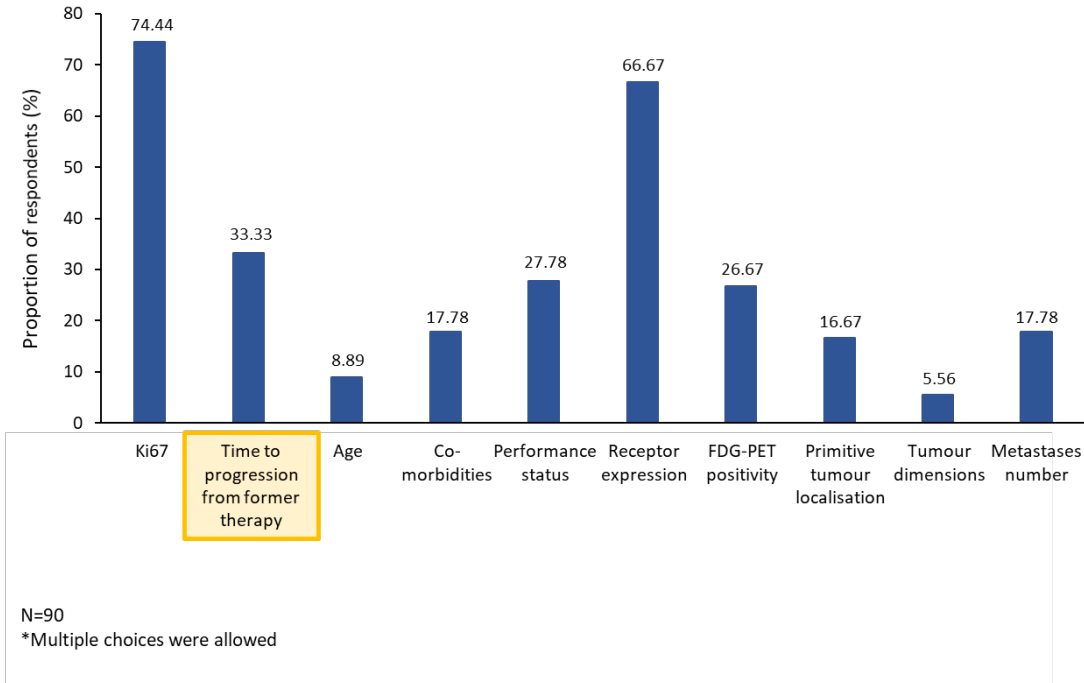

(c)

### What are the major complexities related to RLT in GEP-NET patients?

Please suggest a score from 1 (most relevant) to 11 (least relevant) for each proposed option\*

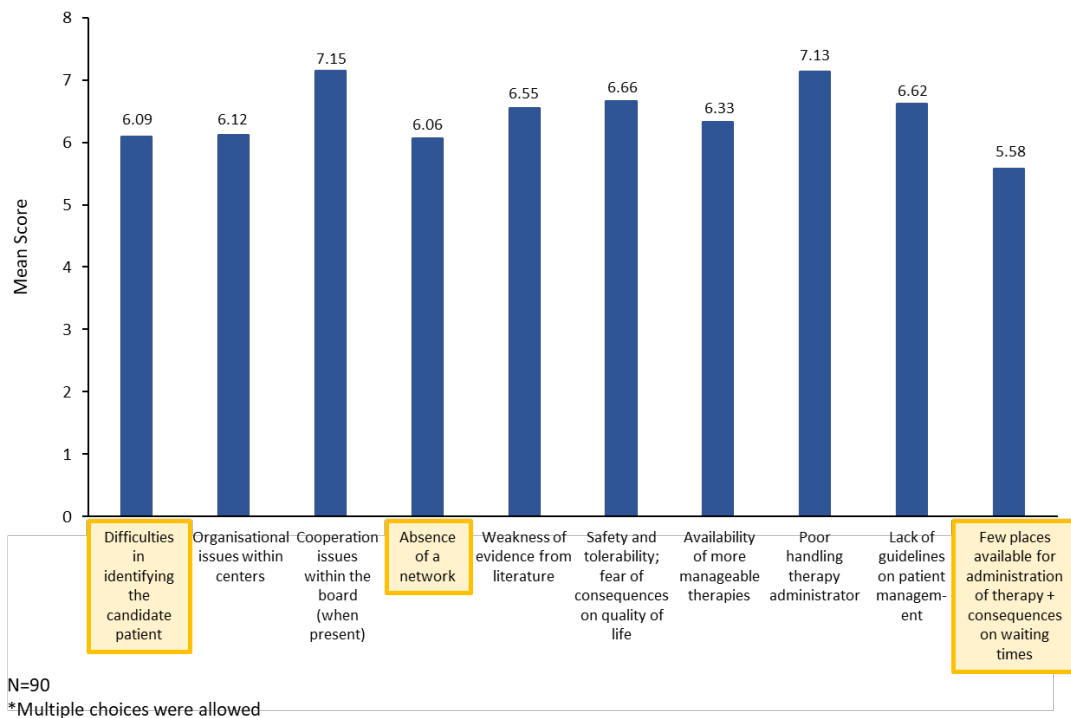

(d)

**When, in the case of RLT, does PET/CT or SPECT execution become important?\***

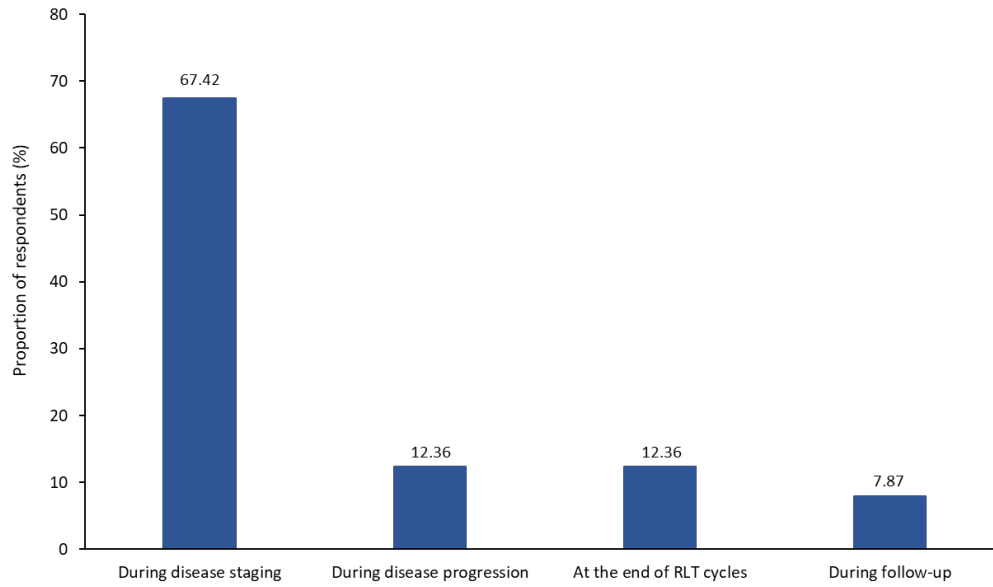

N=90

\*Multiple choices were allowed
